# Supplementary material for: Characteristics of the gut microbiota in women with premenstrual symptoms: A cross-sectional study
Source: PLoS One. 2022 May 27;17(5):e0268466. doi: 10.1371/journal.pone.0268466 (PMC9140228; doi:10.1371/journal.pone.0268466)
Supplement: S3 File — (XLSX) [file pone.0268466.s003.xlsx]

## Sheet: phylum C22P21
Case	P or C	Acidobacteria	Actinobacteria	Bacteroidetes	Euryarchaeota	Firmicutes	Fusobacteria	Not determined	Proteobacteria	Rejected hit	Synergistetes	Verrucomicrobia	p_bacterium CCF-01_incertae_sedis
2	P	0	0.231963	22.9613	0	55.4752	0.00903751	0.262088	1.53035	17.5388	0	1.99126	0
3	P	0.00239401	25.7834	30.4901	0	37.8205	0.00239401	0.00957602	2.85126	3.04039	0	0	0
4	P	0	10.2042	38.6662	0	28.4171	0.0425371	0	2.1434	20.5265	0	0	0
5	P	0	17.9567	14.8798	0	53.062	0	0.296874	1.48861	12.316	0	0	0
6	P	0	8.33288	45.4755	0	41.4366	0	0.00271253	0.648294	3.97385	0	0.130201	0
7	P	0	36.4864	15.7245	0	43.0302	0.333668	0.00971849	1.95018	2.46526	0	0	0
8	P	0	31.7707	7.24842	0	57.6598	0.0351865	0	1.11243	2.17074	0	0	0.00270665
9	P	0	2.96227	25.4029	0	41.8615	0	0	1.01842	19.3721	0	9.38275	0
10	P	0	19.2145	24.5833	0	47.8234	0.0122855	0	1.72407	6.64237	0	0	0
11	P	0	16.4018	11.7805	0	56.7223	9.33086	0	4.18874	1.57574	0	0	0
13	P	0	6.82825	31.9564	0	30.2355	5.33934	0	1.79363	10.5194	0.0865651	12.6593	0.581717
14	P	0	12.9882	29.8892	0	46.3113	0.0268271	0.0996436	2.7172	7.63806	0	0.32959	0
15	P	0	8.19238	41.718	0	46.126	0	0	1.47712	2.48655	0	0	0
17	P	0	1.57021	37.5109	0	21.4933	2.45141	0.00725268	13.3232	23.6365	0	0	0.00725268
18	P	0	13.3824	22.7093	0	47.469	0	0.0698496	1.29838	14.9766	0.0493056	0.0451968	0
19	P	0	8.58299	29.8148	0	47.139	0.106997	0	2.19111	12.1651	0	0	0
20	P	0	6.68609	32.6096	0	54.0716	0.574618	0	1.78542	4.2727	0	0	0
23	C	0	17.7605	26.0573	0	50.2693	0.502621	0	1.43965	3.9707	0	0	0
24	C	0	15.8663	24.4729	0	43.2329	0	0.0471161	2.28513	11.4492	0.0588951	2.58353	0.00392634
25	C	0	7.22468	30.6117	0	49.9008	0	0.0557084	1.65732	10.5184	0	0.031336	0
26	P	0	12.3375	31.4765	0	48.1363	0.0515783	0.00343855	3.31477	4.67987	0	0	0
30	P	0	4.3887	44.2121	0	39.6003	5.18549	0.404768	0.0159357	6.19263	0	0	0
32	P	0	24.4942	22.5075	0	41.0736	0	0.00402998	0.342549	7.69727	0	3.88087	0
35	P	0	18.388	28.2285	0	39.3539	0.0241682	0.0120841	0.886168	13.1072	0	0	0
36	C	0	10.7833	23.1664	0	60.5478	0.00692569	0.799917	0.536741	4.15888	0	0	0
37	C	0	15.3193	43.4672	0	36.0563	0.228297	0.0848797	1.81174	3.03225	0	0	0
38	C	0	13.8573	37.0702	0	42.9284	0.366134	0.00697399	2.55597	3.21501	0	0	0
39	C	0	17.1298	30.667	0	37.4003	0.0275146	0.0589599	2.09111	12.6253	0	0	0
40	C	0	3.13223	48.1669	0	30.3553	0.00593225	0.0741532	2.81189	15.4446	0.00296613	0.00593225	0
42	C	0	11.8016	47.0681	0	29.7433	0	0.00987167	1.49062	9.88648	0	0	0
43	C	0	0.680499	36.1616	0	57.7282	0.0475873	0.22366	0.199867	4.9586	0	0	0
45	C	0	7.7339	39.5393	0	45.1951	0	0.0564175	2.16267	4.32534	0	0.987306	0
47	C	0	8.659	26.7095	0.0327372	33.969	0.0286451	0.0122765	1.88239	28.5837	0.122765	0	0
48	C	0	3.88419	44.6277	0	40.9527	0.00475421	0.0142626	2.66236	7.8492	0	0.00475421	0
49	C	0	5.62294	34.3727	0	52.2609	0.128104	0.00272561	1.788	5.82463	0	0	0
50	C	0	20.6877	34.0015	0.00333511	31.8537	0.00333511	0	2.79149	10.5056	0	0.153415	0
52	C	0	16.5812	43.404	0	31.7941	0.00570093	0	0.609999	7.60219	0	0.00285046	0
53	C	0	6.31325	27.7353	0	57.4375	0	0.00238686	2.80695	5.65448	0	0.0501241	0
54	C	0	6.31001	38.1198	0	48.9771	0.796202	0.0106444	1.89045	3.89373	0	0.00212888	0
55	C	0	7.05405	33.0896	0	55.8451	0	0.0332425	1.50034	2.47767	0	0	0
58	C	0	3.84915	45.2678	0	49.0305	0.0028811	0	0.00864329	1.55003	0	0.290991	0
59	C	0	13.8785	30.9575	0	43.4805	0.287714	0.0296613	4.35427	7.01192	0	0	0
60	C	0	6.05193	34.7157	0	34.5682	13.7279	0	0.344119	10.5904	0	0.00175571	0
